# Supplementary material
Source: MDPI journal article supplement (https://www.mdpi.com/2311-7524/9/9/997)

**Table S1.** Estimates of heterobeltiosis and economic heterosis for days to 50% flowering, maturity, plant height, total number of pods per plant, effective pods per plant and pod length of field pea crosses.

| S.N | Crosses                | DF                 |                     | DM                 |                    | PH                  |                     | TNP                |                     | NEP                |                     | PL                  |                    |
|-----|------------------------|--------------------|---------------------|--------------------|--------------------|---------------------|---------------------|--------------------|---------------------|--------------------|---------------------|---------------------|--------------------|
|     |                        | HB                 | EH                  | HB                 | EH                 | HB                  | EH                  | HB                 | EH                  | HB                 | EH                  | HB                  | HB                 |
| 1.  | P-1541-16 × P-1297-97  | -1.5 <sup>ns</sup> | -11.0*              | -2.1**             | -3.7 <sup>ns</sup> | 32.5**              | 61.6**              | 20.0*              | 64.0**              | 16.7*              | 60.1**              | -17.6**             | -28.0**            |
| 2.  | P-1541-16 × HFP-1314   | 8.4 <sup>ns</sup>  | -2.1 <sup>ns</sup>  | -9.5*              | -11.0**            | -21.3**             | 49.4**              | 29.3**             | 54.6**              | 2.0**              | 48.7**              | -2.0**              | -33.6**            |
| 3.  | P-1541-16 × Aman       | -22.3**            | -9.0 <sup>ns</sup>  | -7.0 <sup>ns</sup> | -8.6*              | 17.9*               | 70.7**              | 51.7**             | 88.8**              | 70.3**             | 93.2**              | -22.3**             | -32.1**            |
| 4.  | P-1541-16 × EC-564817  | 8.4 <sup>ns</sup>  | 6.9 <sup>ns</sup>   | -4.1 <sup>ns</sup> | -5.7 <sup>ns</sup> | 5.8 <sup>ns</sup>   | 70.8**              | -5.6 <sup>ns</sup> | 26.6*               | -9.0 <sup>ns</sup> | 22.7 <sup>ns</sup>  | -13.0*              | -24.0**            |
| 5.  | P-1541-16 × Vikas      | 0.0 <sup>ns</sup>  | -1.4 <sup>ns</sup>  | -7.9 <sup>ns</sup> | -9.4**             | -6.0 <sup>ns</sup>  | 46.6**              | 24.9*              | 36.2**              | 20.4*              | 31.5**              | -32.9**             | -41.3**            |
| 6.  | P-1541-16 × P-92-97-11 | 19.1**             | 7.6 <sup>ns</sup>   | -2.9 <sup>ns</sup> | -4.5 <sup>ns</sup> | -25.0**             | 27.3*               | 0.7 <sup>ns</sup>  | 46.7**              | -4.0 <sup>ns</sup> | 41.5**              | -16.1**             | -26.7**            |
| 7.  | P-1541-16 × P-1426     | -0.8 <sup>ns</sup> | -10.3*              | -6.2 <sup>ns</sup> | -7.8 <sup>ns</sup> | 35.7**              | 65.6**              | 47.2**             | 37.0**              | 41.2**             | 34.3**              | -11.2*              | -18.3**            |
| 8.  | P-1297-97 × HFP-1314   | -8.1 <sup>ns</sup> | -21.4**             | -8.0 <sup>ns</sup> | -11.0**            | 4.9 <sup>ns</sup>   | 99.3**              | -26.9**            | -0.1 <sup>ns</sup>  | -33.0**            | -8.1 <sup>ns</sup>  | -10.3 <sup>ns</sup> | -23.0**            |
| 9.  | P-1297-97 × Aman       | -22.9**            | -9.7*               | -2.1 <sup>ns</sup> | -4.9 <sup>ns</sup> | 35.0**              | 95.5**              | 5.1 <sup>ns</sup>  | 43.7**              | 0.3 <sup>ns</sup>  | 37.6**              | -2.7 <sup>ns</sup>  | -16.0**            |
| 10. | P-1297-97 × EC-564817  | -2.1 <sup>ns</sup> | -3.4 <sup>ns</sup>  | -2.1 <sup>ns</sup> | -4. <sup>ns</sup>  | -43.5**             | -8.9 <sup>ns</sup>  | -54.8**            | -38.3**             | -55.8**            | -39.4**             | 20.9**              | -9.9*              |
| 11. | P-1297-97 × Vikas      | -9.8*              | -11.0 <sup>ns</sup> | -0.8 <sup>ns</sup> | -4.1 <sup>ns</sup> | -34.7**             | 1.8 <sup>ns</sup>   | 3.3 <sup>ns</sup>  | 41.3**              | 5.0 <sup>ns</sup>  | 44.0**              | 9.0 <sup>ns</sup>   | -18.7**            |
| 12. | P-1297-97 × P-92-97-11 | 0.9 <sup>ns</sup>  | -22.1**             | -14.5**            | -18.0**            | -4.4 <sup>ns</sup>  | 62.4**              | -5.9 <sup>ns</sup> | 37.0**              | -9.6 <sup>ns</sup> | 33.3**              | 4.8 <sup>ns</sup>   | -20.8**            |
| 13. | P-1297-97 × P-1426     | 16.0**             | -4.8 <sup>ns</sup>  | 0.8 <sup>ns</sup>  | -3.7 <sup>ns</sup> | -1.9 <sup>ns</sup>  | -14.7 <sup>ns</sup> | -17.3*             | 13.1 <sup>ns</sup>  | -21.2**            | 8.0 <sup>ns</sup>   | -4.6 <sup>ns</sup>  | -12.2*             |
| 14. | HFP-1314 × Aman        | -21.2**            | -7.6 <sup>ns</sup>  | -2.9 <sup>ns</sup> | -5.7 <sup>ns</sup> | -23.2**             | 45.8**              | 8.5 <sup>ns</sup>  | 34.9**              | 14.3 <sup>ns</sup> | 31.8**              | -1.2 <sup>ns</sup>  | -14.7**            |
| 15. | HFP-1314 × EC-564817   | -13.3**            | -14.5**             | -2.9 <sup>ns</sup> | -5.7 <sup>ns</sup> | -11.9*              | 67.3**              | -19.9*             | 7.4 <sup>ns</sup>   | -26.3**            | -0.7 <sup>ns</sup>  | -15.4**             | -27.3**            |
| 16. | HFP-1314 × Vikas       | -2.8 <sup>ns</sup> | -4.1 <sup>ns</sup>  | 0.4 <sup>ns</sup>  | -2.9 <sup>ns</sup> | -11.2 <sup>ns</sup> | 68.6**              | -24.8**            | -10.1 <sup>ns</sup> | -23.4*             | -11.7 <sup>ns</sup> | -25.0**             | -35.5**            |
| 17. | HFP-1314 × P-92-97-11  | 0.0 <sup>ns</sup>  | -14.5**             | -2.1 <sup>ns</sup> | -5.3 <sup>ns</sup> | 5.2 <sup>ns</sup>   | 99.9**              | -26.9**            | 6.4 <sup>ns</sup>   | -27.3**            | 7.1 <sup>ns</sup>   | -7.0 <sup>ns</sup>  | -20.1**            |
| 18. | HFP-1314 × P-1426      | -0.8 <sup>ns</sup> | -15.2**             | -5.5 <sup>ns</sup> | -8.6*              | -4.3 <sup>ns</sup>  | 81.8**              | -0.9 <sup>ns</sup> | 18.4 <sup>ns</sup>  | -0.8 <sup>ns</sup> | 14.4 <sup>ns</sup>  | -5.1 <sup>ns</sup>  | -12.7*             |
| 19. | Aman × EC-564817       | -29.4**            | -17.2**             | -4.2 <sup>ns</sup> | -6.9 <sup>ns</sup> | -11.1 <sup>ns</sup> | 43.5**              | -17.7*             | 10.4 <sup>ns</sup>  | -19.7*             | 8.2 <sup>ns</sup>   | 4.5 <sup>ns</sup>   | -9.7*              |
| 20. | Aman × Vikas           | -6.5 <sup>ns</sup> | 9.7*                | -3.4**             | -6.1 <sup>ns</sup> | -9.5 <sup>ns</sup>  | 41.1**              | 34.9**             | 67.8**              | 48.4**             | 68.3**              | -15.3**             | -26.9**            |
| 21. | Aman × P-92-97-11      | -16.5**            | -2.1 <sup>ns</sup>  | -4.2 <sup>ns</sup> | -6.9 <sup>ns</sup> | 0.2 <sup>ns</sup>   | 70.2**              | 0.4 <sup>ns</sup>  | 46.2**              | 1.7 <sup>ns</sup>  | 50.0**              | -5.6 <sup>ns</sup>  | -18.5**            |
| 22. | Aman × P-1426          | -15.9**            | -1.4 <sup>ns</sup>  | -1.3 <sup>ns</sup> | -4.1 <sup>ns</sup> | 5.8 <sup>ns</sup>   | 53.2**              | 17.9*              | 46.7**              | 30.9**             | 48.4**              | -4.3 <sup>ns</sup>  | -12.0*             |
| 23. | EC-564817 × Vikas      | 9.8*               | 8.3 <sup>ns</sup>   | -1.7**             | -4.5 <sup>ns</sup> | -8.8 <sup>ns</sup>  | 47.1**              | -23.8**            | 2.12 <sup>ns</sup>  | -29.**             | -5.1 <sup>ns</sup>  | 24.5**              | -8.6 <sup>ns</sup> |
| 24. | EC-564817 × P-92-97-11 | 9.1 <sup>ns</sup>  | 7.6 <sup>ns</sup>   | -3.4 <sup>ns</sup> | -6.1 <sup>ns</sup> | 3.2 <sup>ns</sup>   | 75.3**              | -27.9**            | 5.0 <sup>ns</sup>   | -29.0**            | 4. <sup>ns</sup>    | 12.9*               | -14.7**            |
| 25. | EC-564817 × P-1426     | 0.7 <sup>ns</sup>  | -0.7 <sup>ns</sup>  | -1.7 <sup>ns</sup> | -4.5 <sup>ns</sup> | -4.8 <sup>ns</sup>  | 53.6**              | 0. <sup>ns</sup>   | 34.6**              | 0.6 <sup>ns</sup>  | 35.7**              | -20.5**             | -26.8**            |
| 26. | Vikas × P-92-97-11     | -11.9*             | -13.1**             | -3.8 <sup>ns</sup> | -6.9 <sup>ns</sup> | -10.1 <sup>ns</sup> | 52.6**              | 0.01 <sup>ns</sup> | 45.7**              | -0.9 <sup>ns</sup> | 46.1**              | -0.7 <sup>ns</sup>  | -24.9**            |
| 27. | Vikas × P-1426         | -1.4 <sup>ns</sup> | -2.8 <sup>ns</sup>  | -2.1 <sup>ns</sup> | -5.3 <sup>ns</sup> | -48.1**             | -19.1 <sup>ns</sup> | -23.6*             | -16.7 <sup>ns</sup> | -22.0*             | -14.8 <sup>ns</sup> | -8.3 <sup>ns</sup>  | -15.6**            |
| 28. | P-92-97-11 × P-1426    | -6.7 <sup>ns</sup> | -23.4**             | -4.3 <sup>ns</sup> | -8.2 <sup>ns</sup> | 5.8 <sup>ns</sup>   | 79.6**              | -27.0**            | 6.3 <sup>ns</sup>   | -30.3**            | 2.7 <sup>ns</sup>   | -8.0 <sup>ns</sup>  | -15.3**            |

\* Significant at  $p \leq 0.05$ , \*\* Significant at  $p \leq 0.01$ , ns- Non-significant at  $p \leq 0.05$ , HB- Heterobeltiosis, EH- Economic Heterosis

**Table S2.** Estimates of heterobeltiosis and economic heterosis for number of seeds per pod, 100-seed weight, biological yield per plant and seed yield per plant of field pea crosses

| S.N. | Crosses                | NSP                |                     | SW                 |                    | BY                 |                     | SY                  |                    |
|------|------------------------|--------------------|---------------------|--------------------|--------------------|--------------------|---------------------|---------------------|--------------------|
|      |                        | HB                 | EH                  | HB                 | EH                 | HB                 | EH                  | HB                  | EH                 |
| 1.   | P-1541-16 × P-1297-97  | -18.3**            | -15.0**             | 16.3**             | 23.3**             | 2.5 <sup>ns</sup>  | 65.1**              | 11.9 <sup>ns</sup>  | 169.7**            |
| 2.   | P-1541-16 × HFP-1314   | -26.**             | -17.2**             | -8.9 <sup>ns</sup> | 2.1 <sup>ns</sup>  | -5.3 <sup>ns</sup> | 47.8**              | -5. <sup>ns</sup>   | 126.5**            |
| 3.   | P-1541-16 × Aman       | -25.**             | -15.4**             | 0.6 <sup>ns</sup>  | 0.6 <sup>ns</sup>  | 30.2**             | 69.9**              | 26.0*               | 150.1**            |
| 4.   | P-1541-16 × EC-564817  | -13.45**           | -10.0 <sup>ns</sup> | 25.1**             | 25.1**             | 33.9**             | 76.3**              | 23.2*               | 155.1**            |
| 5.   | P-1541-16 × Vikas      | -25.3**            | -22.3**             | 3.6 <sup>ns</sup>  | 3.6 <sup>ns</sup>  | -1.6 <sup>ns</sup> | 28.3*               | -0.3 <sup>ns</sup>  | 76.2**             |
| 6.   | P-1541-16 × P-92-97-11 | -9.6*              | -6.0 <sup>ns</sup>  | 15.1**             | 15.1**             | 45.6**             | 90.0**              | 49.6**              | 164.2**            |
| 7.   | P-1541-16 × P-1426     | -30.6**            | -15.0**             | 8.5 <sup>ns</sup>  | 11.78*             | 20.3*              | 56.9**              | 26.0*               | 122.5**            |
| 8.   | P-1297-97 × HFP-1314   | -13.7**            | -3.4 <sup>ns</sup>  | 18.4**             | 32.7**             | -16.2*             | 35.0*               | -16.5 <sup>ns</sup> | 101.2**            |
| 9.   | P-1297-97 × Aman       | -10.5*             | 2.0 <sup>ns</sup>   | -4.0 <sup>ns</sup> | 1. <sup>ns</sup>   | -3.1 <sup>ns</sup> | 56.**               | -0.5 <sup>ns</sup>  | 139.7**            |
| 10.  | P-1297-97 × EC-564817  | 28.1**             | 23.0**              | 5. <sup>ns</sup>   | 12.15*             | -40.8**            | -4.6 <sup>ns</sup>  | -43.9**             | 35.1 <sup>ns</sup> |
| 11.  | P-1297-97 × Vikas      | 6.1 <sup>ns</sup>  | 1.9 <sup>ns</sup>   | -6.3 <sup>ns</sup> | -0.6 <sup>ns</sup> | 2.5 <sup>ns</sup>  | 65.0**              | 5.1 <sup>ns</sup>   | 153.**             |
| 12.  | P-1297-97 × P-92-97-11 | 2.3 <sup>ns</sup>  | -1.8 <sup>ns</sup>  | 13.1*              | 20.0**             | 7.1 <sup>ns</sup>  | 72.5**              | 9.9 <sup>ns</sup>   | 164.9**            |
| 13.  | P-1297-97 × P-1426     | -15.8**            | 3.0 <sup>ns</sup>   | 18.6**             | 25.8**             | -5.9 <sup>ns</sup> | 51.5**              | -10.8 <sup>ns</sup> | 115.0**            |
| 14.  | HFP-1314 × Aman        | -10.5*             | 2.0 <sup>ns</sup>   | -2.6 <sup>ns</sup> | 9.2 <sup>ns</sup>  | 8.2 <sup>ns</sup>  | 68.8**              | 7.2 <sup>ns</sup>   | 157.0**            |
| 15.  | HFP-1314 × EC-564817   | -13.7**            | -3.4 <sup>ns</sup>  | -13.0**            | -2.4 <sup>ns</sup> | -28.4**            | 11.7 <sup>ns</sup>  | -34.2**             | 57.7*              |
| 16.  | HFP-1314 × Vikas       | -27.3**            | -18.6**             | 3.2 <sup>ns</sup>  | 15.8**             | -31.0**            | 7.7 <sup>ns</sup>   | -38.6**             | 47.3*              |
| 17.  | HFP-1314 × P-92-97-11  | -4.5 <sup>ns</sup> | 7.0 <sup>ns</sup>   | -10.3*             | 0.6 <sup>ns</sup>  | -20.4*             | 24.2 <sup>ns</sup>  | -21.2*              | 88.9**             |
| 18.  | HFP-1314 × P-1426      | -8.9*              | 11.5*               | -1.9 <sup>ns</sup> | 10. <sup>ns</sup>  | -2.1 <sup>ns</sup> | 52.8**              | -1.7 <sup>ns</sup>  | 135.8**            |
| 19.  | Aman × EC-564817       | 2.6 <sup>ns</sup>  | 17.0**              | 31.0**             | 19.1**             | 26.**              | 66.4**              | 22.5*               | 153.7**            |
| 20.  | Aman × Vikas           | -24.1**            | -13.5*              | 17.2**             | 3. <sup>ns</sup>   | 33.90**            | 72.8**              | 32.5**              | 163.1**            |
| 21.  | Aman × P-92-97-11      | -9.4*              | 3.3 <sup>ns</sup>   | -8.3 <sup>ns</sup> | -19.34**           | 10.6 <sup>ns</sup> | 43.7**              | 11.1 <sup>ns</sup>  | 120.56**           |
| 22.  | Aman × P-1426          | -8.*               | 12.2*               | -9.4 <sup>ns</sup> | -6.7 <sup>ns</sup> | 21.7*              | 58.1**              | 22.4*               | 143.1**            |
| 23.  | EC-564817 × Vikas      | 42.1**             | 35.0**              | 19.3**             | 8.5 <sup>ns</sup>  | 24.4**             | 63.7**              | 21.9*               | 152.3**            |
| 24.  | EC-564817 × P-92-97-11 | 9.45 <sup>ns</sup> | 4.0 <sup>ns</sup>   | -117 <sup>ns</sup> | -19.7**            | -32.2**            | -10.8 <sup>ns</sup> | -26.9*              | 51.3*              |
| 25.  | EC-564817 × P-1426     | -25.3**            | -8. <sup>ns</sup>   | 12.6*              | 16.01**            | 20.*               | 58.8**              | 22.4*               | 153.4**            |
| 26.  | Vikas × P-92-97-11     | -1.1 <sup>ns</sup> | -8.0 <sup>ns</sup>  | 13.8*              | 0.1 <sup>ns</sup>  | 33.8**             | 53.8**              | 44.6**              | 133.3**            |
| 27.  | Vikas × P-1426         | -8.5*              | 12.0*               | 4.7 <sup>ns</sup>  | 7.9 <sup>ns</sup>  | 25.5 <sup>ns</sup> | 14. <sup>ns</sup>   | 11.9 <sup>ns</sup>  | 59.3*              |
| 28.  | P-92-97-11 × P-1426    | -9.6*              | 10.6*               | 27.1**             | 30.9**             | 43.5**             | 65.0**              | 49.4**              | 141.0**            |

\* Significant at  $p \leq 0.05$ , \*\* Significant at  $p \leq 0.01$ , ns- Non-significant at  $p \leq 0.05$ , HB- Heterobeltiosis, EH- Economic Heterosis

**Table S3.** Parents and crosses possess good CGA and SCA effects for different traits in field pea.

| S.N. | Traits | Full Name of Traits                | Unit           | Parents                                 | Crosses                                                                                                                                                                                                                                                                                   |
|------|--------|------------------------------------|----------------|-----------------------------------------|-------------------------------------------------------------------------------------------------------------------------------------------------------------------------------------------------------------------------------------------------------------------------------------------|
| 1.   | DF     | Days to 50% flowering              | Number of days | P-1297-97, HFP 1314, P-92-97-11, P-1426 | P-1541-16 × Aman, HFP 1314 × EC 564817, Aman × EC 564817, Vikas × P-92-97-11, P-92-97-11 × P-1426                                                                                                                                                                                         |
| 2.   | DM     | Days to maturity                   | Number of days | --                                      | P-1541-16 × HFP 1314, P-1297-97 × P-92-97-11                                                                                                                                                                                                                                              |
| 3.   | PH     | Plant height                       | cm             | P-1297-97, Vikas, P-1426                | P-1541-16 × HFP 1314, P-1541-16 × P-92-97-11, P-1297-97 × EC 564817, P-1297-97 × Vikas, P-1297-97 × P-1426, HFP 1314 × Aman, Aman × EC 564817, Vikas × P-1426                                                                                                                             |
| 4.   | TNP    | Total number of pods per plant     | number         | P-1541-16, Aman, P-92-97-11,            | P-1541-16 × P-1297-97, P-1541-16 × HFP-1314, P-1541-16 × Aman, P-1541-16 × P-1426, P-1297-97 × Vikas, HFP-1314 × P-1426, Aman × Vikas, Aman × P-1426, EC-564817 × P-1426, Vikas × P-92-97-11                                                                                              |
| 5.   | NEP    | Number of effective pods per plant | number         | P-1541-16, Aman, P-92-97-11             | P-1541-16 × P-1297-97, P-1541-16 × HFP-1314, P-1541-16 × Aman, P-1541-16 × P-1426, P-1297-97 × Vikas, HFP-1314 × P-1426, Aman × Vikas, Aman × P-1426, EC-564817 × P-1426, Vikas × P-92-97-11                                                                                              |
| 6.   | PL     | Pod length                         | cm             | Aman, P-1426                            | P-1297-97 × EC-564817, P-1297-97 × Vikas, Aman × EC-564817, EC-564817 × Vikas                                                                                                                                                                                                             |
| 7.   | NSP    | Number of seeds per pod            | number         | Aman, EC 564817, P-1426                 | P-1297-97 × EC-564817, P-1297-97 × Vikas, HFP-1314 × P-92-97-11, Aman × EC-564817, EC-564817 × Vikas, Vikas × P-1426                                                                                                                                                                      |
| 8.   | SW     | 100-seed weight                    | g              | P-1541-16, P-1297-97, HFP 1314, P-1426  | P-1541-16 × P-1297-97, P-1541-16 × EC-564817, P-1541-16 × P-92-97-11, P-1297-97 × HFP-1314, P-1297-97 × P-92-97-11, P-1297-97 × P-1426, HFP-1314 × Aman, HFP-1314 × Vikas, Aman × EC-564817, Aman × Vikas, EC-564817 × Vikas, EC-564817 × P-1426, Vikas × P-92-97-11, P-92-97-11 × P-1426 |
| 9.   | BY     | Biological yield per plant         | g              | P-1541-16, P-1297-97, Aman,             | P-1541-16 × EC-564817, P-1541-16 × P-92-97-11, P-1297-97 × Vikas, P-1297-97 × P-92-97-11, HFP-1314 × Aman, HFP-1314 × P-1426, Aman × EC-564817, Aman × Vikas, EC-564817 × Vikas, EC-564817 × P-1426, Vikas × P-92-97-11                                                                   |
| 10.  | SY     | Seed yield per plant               | g              | P-1297-97, Aman                         | P-1541-16 × P-1297-97, P-1541-16 × EC-564817, P-1541-16 × P-92-97-11, P-1297-97 × Vikas, P-1297-97 × P-92-97-11, HFP-1314 × Aman, HFP-1314 × P-1426, Aman × EC-564817, Aman × Vikas, EC-564817 × Vikas, EC-564817 × P-1426, Vikas × P-92-97-11, P-92-97-11 × P-1426                       |

**Figure S1:** Box plots for comparison of average performance of all the 8 parents (P) and 28 crosses (H) to different traits (A to J) under study. The upper and lower line outside box represents the maximum and minimum adjacent values, respectively. The dark black line within the box represents median value. The upper and lower hinge represent 75% and 25% percentile, respectively. Outliers are represented by circle 'o'.

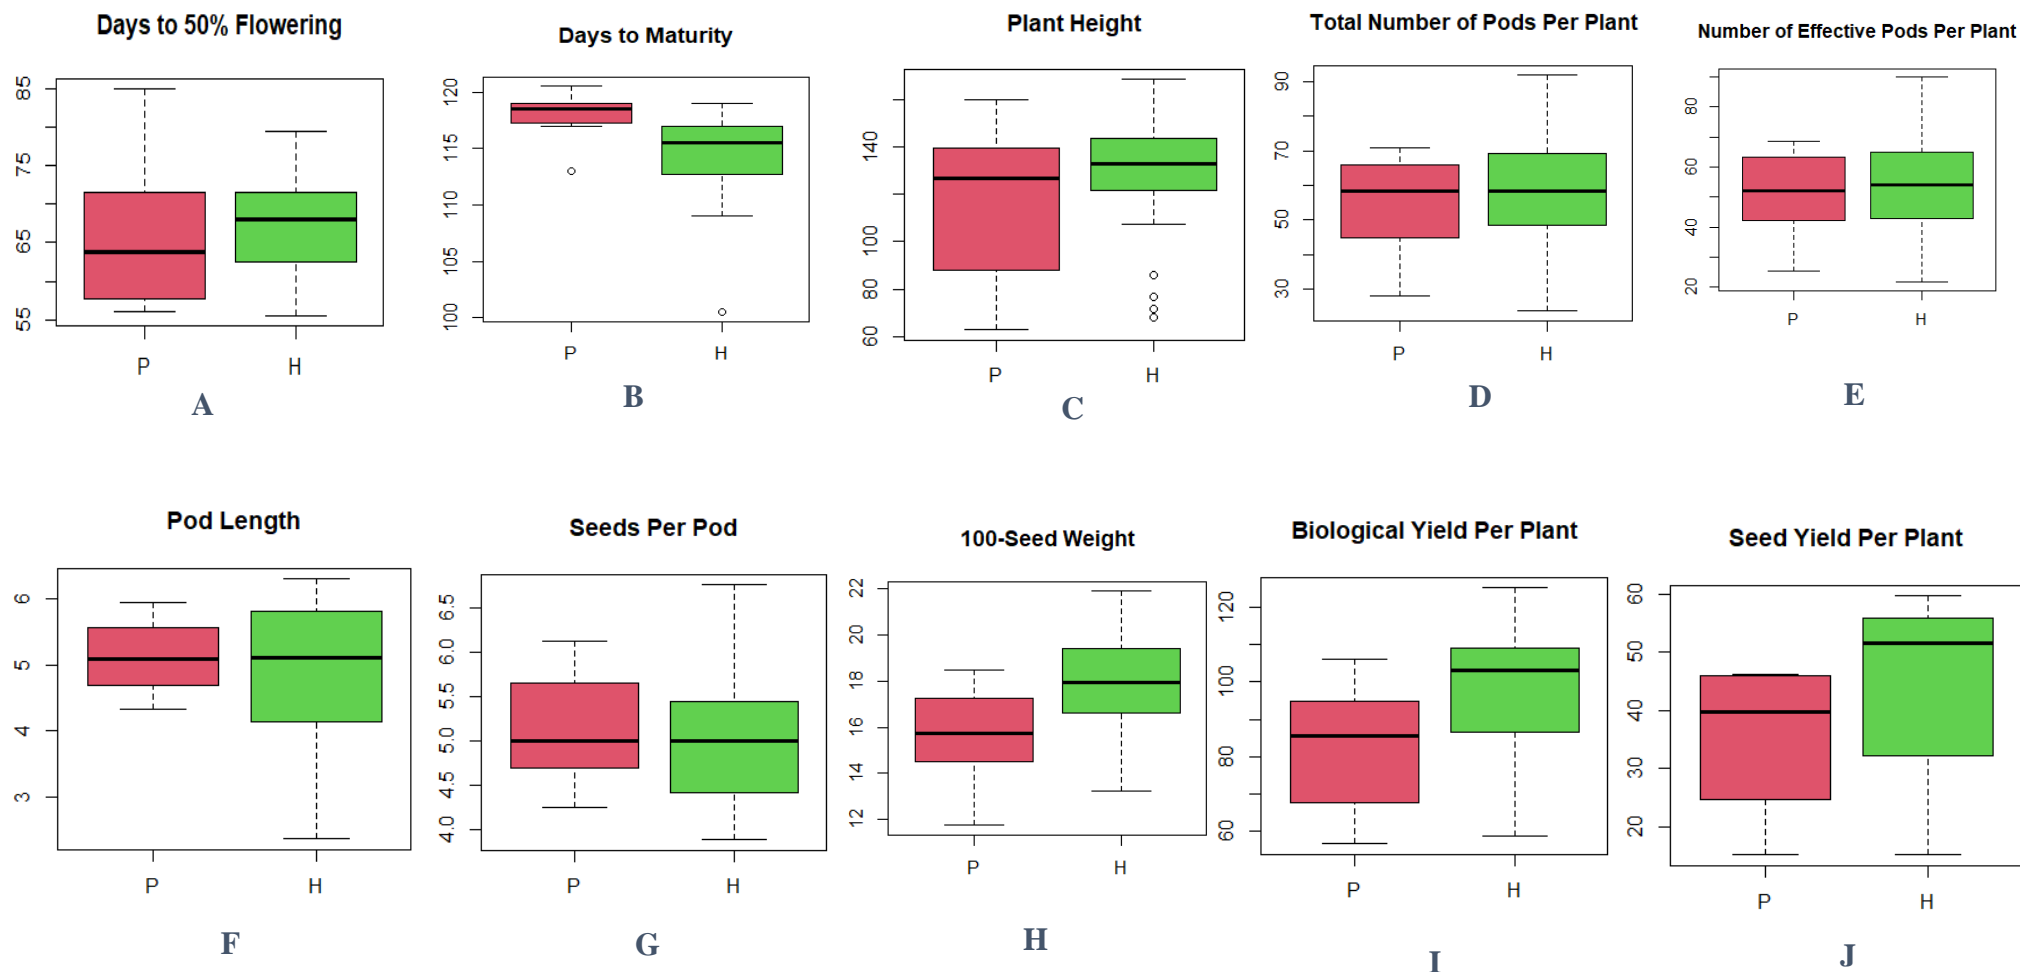

Supplement: s1 [file s1]
